# Supplementary material for: Alpha 7 nicotinic receptors attenuate neurite development through calcium activation of calpain at the growth cone
Source: PLoS One. 2018 May 16;13(5):e0197247. doi: 10.1371/journal.pone.0197247 (PMC5955587; doi:10.1371/journal.pone.0197247)
Supplement: S2 File — (XLSX) [file pone.0197247.s002.xlsx]

## Sheet: Wt expressing PC12 cells
Control							Choline 1mM							Calpeptin 26uM							Chol 1mM+Calpeptin 26uM
Id	Length	Branches	Total Process	Growth Cones	Conversion		Id	Length	Branches	Total Process	Growth Cones	Conversion		Id	Length	Branches	Total Process	Growth Cones	Conversion		Id	Length	Branches	Total Process	Growth Cones	Conversion
1a	396.155	0	1	1	39.6551		1a	400.961	2	2	3	40.1362		1a	440.124	2	1	3	44.0564		1a	555.389	1	5	2	55.5944
2a	316.277	2	3	3	31.6593		2a	161.8	0	2	1	16.1962		2a	361.08	1	1	2	36.1441		2a	351.89	1	2	2	35.2242
3a	253.221	1	2	2	25.3474		3a	367.292	0	1	1	36.7659		3a	356.053	0	1	1	35.6409		3a	280.686	0	1	1	28.0967
5a	288.753	1	2	1	28.9042		4a	243.857	0	2	1	24.4101		4a1	308.39	0	1	1	30.8698		4a	409.635	2	1	3	41.0045
6a	299.575	0	1	1	29.9875		5a	172.36	1	2	2	17.2532		5a	530.055	3	2	4	53.0585		5a	411.721	1	2	2	41.2133
7a	304.835	0	4	1	30.514		6a	202.694	0	2	1	20.2897		6a	357.057	1	2	2	35.7414		6a	362.787	1	3	2	36.315
7b	335.973	0	4	1	33.6309		7a	526.076	1	5	3	52.6602		7a	582.92	3	2	4	58.3503		7a	669.289	2	2	3	66.9958
8a	178.849	0	1	1	17.9028		8a	377.408	1	1	2	37.7785		8a	272.541	1	1	2	27.2814		8a	357	2	3	3	35.7357
9a	423.145	0	1	1	42.3568		9a	217.01	0	1	1	21.7227		9a	440.279	0	2	1	44.0719		9a	419.195	1	1	2	41.9614
10a	303.186	1	3	2	30.3489		10a	195.479	0	1	1	19.5674		10a	527.595	0	1	1	52.8123		10a	457.522	1	6	2	45.798
11a	313.577	1	2	2	31.3891		11a	583.972	2	2	4	58.4556		11a	570.16	1	1	2	57.073		11a	179.365	0	4	1	17.9544
13	437.369	1	1	2	43.7806		12a	128.878	0	2	1	12.9007		12a	369.333	1	2	2	36.9702		12a	284.897	0	2	1	28.5182
14a	286.546	2	1	3	28.6833		13a	526.995	3	1	4	52.7522		13a	443.075	1	1	2	44.3518		13a	228.292	2	4	3	22.852
15a	293.38	1	1	2	29.3673		14a	162.457	0	2	1	16.2619		14a	372.675	2	3	3	37.3048		14a	420.079	2	3	3	42.0499
16a	205.142	1	2	2	20.5347		15a	150.318	0	1	1	15.0468		15a	426.249	2	3	3	42.6675		15a	327.207	2	3	3	32.7534
17a	172.605	0	1	1	17.2778		16a	213.509	0	1	1	21.3723		16a	270	1	2	2	27.027		16a	349.017	1	3	2	34.9366
18a	349.759	1	2	2	35.0109		17a	294.573	1	2	2	29.4868		17a	428.116	2	2	3	42.8544		17a	407.546	1	4	2	40.7954
19a	409	1	1	2	40.9409		18a	158.806	0	1	1	15.8965		18a	439.102	1	1	2	43.9541		18a	277.687	2	2	3	27.7965
20a	179.264	0	1	1	17.9443		19a	181.714	0	1	1	18.1896		19a	608.797	2	4	3	60.9406		19a	298.583	1	3	2	29.8882
12a	452.788	1	3	2	45.3241		20a	222.011	1	2	2	22.2233		20a	193.688	0	1	1	19.3882		20a	233.516	0	2	1	23.375
Average	309.97	0.7	1.85	1.65	31.028		Average	274.409	0.6	1.7	1.7	27.4683		Average	414.864	1.2	1.7	2.2	41.5279		Average	364.065	1.15	2.8	2.15	36.4429
SEM	19.0424	0.146898	0.232549	0.15	1.90614		SEM	31.4074	0.197351	0.206474	0.23056	3.14388		SEM	24.8131	0.212751	0.193309	0.212751	2.48379		SEM	25.5086	0.166623	0.295581	0.166623	2.55341
	Length	Branches	Total Process	Growth Cones	Conversion			Length	Branches	Total Process	Growth Cones	Conversion
Control	309.97	0.7	1.85	1.65	31.028		SEM	19.0424	0.146898	0.232549	0.15	1.90614
Choline	274.409	0.6	1.7	1.7	27.4683		SEM	31.4074	0.197351	0.206474	0.23056	3.14388
Calpeptin	414.864	1.2	1.7	2.2	41.5279		SEM	24.8131	0.212751	0.193309	0.212751	2.48379
Chol+Cal	364.065	1.15	2.8	2.15	36.4429		SEM	25.5086	0.166623	0.295581	0.166623	2.55341

## Sheet: A7345-8A Expressing PC12 cells
Control							Choline 1mM							Calpeptin 26uM							Chol 1mM+Calpeptin 26uM
Id	Length	Branches	Total Process	Growth Cones	Conversion		Id	Length	Branches	Total Process	Growth Cones	Conversion		Id	Length	Branches	Total Process	Growth Cones	Conversion		Id	Length	Branches	Total Process	Growth Cones	Conversion
1a	228.203	1	1	2	22.8431		1a	532.628	1	2	3	53.3161		1a	566.704	0	3	1	56.7271		1a	383.944	1	3	2	38.4328
2a	330.511	1	3	2	33.0842		2a	443.248	1	2	2	44.3691		2a	532.751	1	3	2	53.3284		2a	369.822	1	2	2	37.0192
3a	649.161	0	5	1	64.981		3a	414.265	2	2	3	41.4679		3a	550.983	1	1	2	55.1534		3a	589.503	1	2	2	59.0093
4a	270.129	1	2	2	27.0399		4a	344.019	0	2	1	34.4363		4a1	373.409	1	2	3	37.3782		4a	472.944	2	2	3	47.3417
5a	262.634	0	2	1	26.2897		5a	324.285	1	3	2	32.4609		5a	269.414	0	1	1	26.9683		5a	256.35	0	1	1	25.6606
6a	289.585	1	1	2	28.9875		6a	297.803	0	1	1	29.8101		6a	330.208	1	4	2	33.0538		6a	396.418	1	1	2	39.6814
7a	915.194	2	1	3	91.6109		7a	1036.17	0	1	1	103.721		7a	241.606	1	1	2	24.1848		7a	726.091	2	4	3	72.6817
8a	245.631	0	1	1	24.5877		8a	673.043	0	1	1	67.3716		8a	380.569	0	3	1	38.095		8a	245.851	0	1	1	24.6097
9a	412.062	2	2	3	41.2474		9a	401.519	1	2	2	40.1921		9a	336.363	1	2	2	33.6699		9a	452.124	2	2	3	45.2576
10a	260.797	1	1	2	26.1058		10a	751.203	2	3	3	75.1954		10a	422.859	1	3	2	42.3282		10a	235.383	0	1	1	23.5618
11a	263.772	1	2	2	26.4036		11a	344.182	0	2	1	34.4526		11a	367.745	1	2	1	36.8113		11a	316.537	0	1	1	31.6854
12a	309.461	1	1	2	30.977		12a	323.913	0	2	1	32.4237		12a	298.625	0	3	1	29.8924		12a	286.569	0	2	1	28.6856
13a	845.443	3	3	5	84.6288		13a	483.613	0	2	1	48.4097		13a	327.45	0	3	1	32.7777		13a	424.582	1	1	3	42.5007
14a	325.358	2	1	3	91.1002		14a	587.754	1	1	2	58.8342		14a	307.011	1	1	2	30.7318		14a	259.359	1	5	2	25.9618
15a	438.869	1	1	2	43.9308		15a	404.602	0	3	1	40.5007		15a	316.018	0	1	1	31.6334		15a	498.31	1	3	2	49.8808
16a	283.371	1	1	2	28.3654		16a	270.108	0	3	1	27.0378		16a	521.245	1	5	2	52.1766		16a	274.887	1	1	2	27.5162
17a	593.427	2	1	3	59.402		17a	264.318	0	2	1	26.4582		17a	656.714	2	1	4	65.7371		17a	530.134	2	2	3	53.0664
18a	184.346	0	2	1	18.453		18a	216.721	0	4	1	21.6938		18a	514.378	1	1	2	51.4892		18a	397.674	1	4	2	39.8072
19a	205.482	0	1	1	20.5687		19a	394.407	2	2	3	39.4801		19a	210.752	0	1	1	21.0963		19a	399.22	1	1	3	39.9619
20a	225.541	1	2	2	22.5767		20a	248.15	0	7	2	24.8398		20a	301.636	1	2	2	30.1938		20a	319.324	1	1	2	31.9643
Average	376.949	1.05	1.7	2.1	40.6592		Average	437.798	0.55	2.35	1.65	43.8235		Average	391.322	0.7	2.15	1.75	39.1713		Average	391.751	0.95	2	2.05	39.2143
SEM	47.0318	0.184605	0.23056	0.21643	5.39798		SEM	44.6078	0.169752	0.301531	0.181731	4.46524		SEM	27.6647	0.127733	0.264326	0.175844	2.76924		SEM	28.589	0.153469	0.271448	0.169752	2.86176
	Length	Branches	Total Process	Growth Cones	Conversion			Length	Branches	Total Process	Growth Cones	Conversion
Control	376.949	1.05	1.7	2.1	40.6592		SEM	47.0318	0.184605	0.23056	0.21643	5.39798
Choline	437.798	0.55	2.35	1.65	41.6318		SEM	44.6078	0.169752	0.301531	0.181731	4.6129
Calpeptin	391.322	0.7	2.15	1.75	39.1713		SEM	27.6647	0.127733	0.264326	0.175844	2.76924
Chol+Cal	391.751	0.95	2	2.05	39.2143		SEM	28.589	0.153469	0.271448	0.169752	2.86176
